# Supplementary material for: Self-assembly of trithia-9-crown-3 and octathia-24-crown-8 on Au(111) surfaces
Source: Royal Society of Chemistry journal article supplement (doi:10.1039/c6ra10063e), 2016-01-01
Supplement: c6ra10063e1.pdf [file c6ra10063e1.pdf]

## Self-assembly of Trithia-9-crown-3 and Octathia-24-crown-8 on Au(111) surfaces

Xiao-Ping Liu<sup>a,b,§</sup>, Ke Deng<sup>a,b,§</sup>, Qian Wei<sup>a,b</sup>, Minghui Liang<sup>a</sup>, Zhan-Jun Zhang<sup>b,\*</sup>,  
Peng Jiang<sup>a,c,\*</sup>

<sup>a</sup> CAS Center for Excellence in Nanoscience, CAS Key Laboratory of Standardization and Measurement for Nanotechnology, National Center for Nanoscience and Technology (NCNST), Beijing 100190, P.R.China

<sup>b</sup>University of Chinese Academy of Sciences, Beijing 100049, China

E-mail address: [pjiang@nanoctr.cn](mailto:pjiang@nanoctr.cn); Tel: +86-10-82545549 and [zhangzj@ucas.ac.cn](mailto:zhangzj@ucas.ac.cn)

### Computational Details

Theoretical calculations were performed using density functional theory (DFT) provided by the DMol3 code.<sup>[1]</sup> We use the periodic boundary conditions (PBC) to describe the 2D periodic structure on the Au surface in this work. In DMol3, the electronic wave function was expanded in a localized atom-centered basis set with each basis function defined numerically on a dense radial grid. We used the double-numeric polarized (DND) basis sets.<sup>[2,3]</sup> The Perdew and Wang parameterization of the local exchange-correlation energy were applied in the local spin density approximation (LSDA) to describe exchange and correlation.<sup>[4]</sup> The inner core electrons for Au were represented by the DFT semilocal pseudo-potential (DSPP) specifically developed for DMol3 calculations, while nineteen electrons were treated explicitly for Au ( those corresponding to the atomic levels 5s, 5p, 5d, 6s). Each basis function was restricted to within a cutoff radius of  $R_{cut}=5.5\text{Å}$ . Spin-restricted wave functions were employed. A self-consistent field procedure was done with a convergence criterion of  $10^{-5}$  a.u. on the energy and electron density.

To evaluate the adsorption energy of ring molecules on the Au (111) surface, we adopt three-layer Au slab model as the simplified model. An optimized Au lattice parameter  $2.8838\text{Å}$  is used in the calculation to reduce the effect of the stress. Test calculations show that the adsorption energy does not change significantly by using three- or four-metal slab models. During the structural optimizations, we only allow

the Au atoms in the surface layer and the adsorbed ring molecules to move until all forces vanished within  $1.0 \times 10^{-4}$  hartrees per bohr. The Au atoms in the inner layer are fixed in their bulk configurations. The adsorption energy is defined as  $E_{ad} = E_{Au+ring} - (E_{Au} + E_{ring})$ .

Reference:

- [1] A. Becke, *J. Chem. Phys.* 1988, **88**, 2547.
- [2] B. Delley, *J. Chem. Phys.* 2000, **113**, 7756.
- [3] B. Delley, *J. Chem. Phys.* 1990, **92**, 508– 517.
- [4] J. P. Perdew, Y. Wang, *Phys. Rev. B* 1992, **45**, 13244.

**Table S1.** Experimental (Expt.) and calculated (Cal.) lattice parameters for the self-assembled monolayers on Au (111).

|                |       | Unit cell parameters |                |                    |
|----------------|-------|----------------------|----------------|--------------------|
|                |       | a (nm)               | b (nm)         | $\alpha(^{\circ})$ |
| 9S3            | Expt. | $0.6 \pm 0.05$       | $1.2 \pm 0.05$ | $90 \pm 1.0$       |
|                | Cal.  | 0.75                 | 1.30           | 90.00              |
| 24S8- $\alpha$ | Expt. | $0.6 \pm 0.05$       | $2.4 \pm 0.05$ | $90 \pm 1.0$       |
|                | Cal.  | 0.50                 | 2.31           | 90.00              |
| 24S8- $\beta$  | Expt. | $0.6 \pm 0.05$       | $2.9 \pm 0.05$ | $90 \pm 1.0$       |
|                | Cal.  | 0.50                 | 2.88           | 90.00              |
